# Supplementary material for: Nitrogen-doped carbon quantum dots for fluorescence detection of Cu2+ and electrochemical monitoring of bisphenol A
Source: Royal Society of Chemistry journal article supplement (doi:10.1039/c8ra03180k), 2018-01-01
Supplement: c8ra03180k1.pdf [file c8ra03180k1.pdf]

**Supporting information for**  
**Nitrogen-doped carbon quantum dots for fluorescent detection of**  
**Cu<sup>2+</sup> and electrochemical monitoring of bisphenol A**

Xinran Wu<sup>1,a</sup>, Lina Wu<sup>1,b</sup>, Xizhong Cao<sup>b</sup>, Ying Li<sup>a</sup>, Anran Liu<sup>a,\*</sup>, Songqin Liu<sup>a</sup>

*<sup>a</sup>Jiangsu Engineering Laboratory of Smart Carbon-Rich Materials and Device (CMD), Jiangsu Province Hi-Tech Key Laboratory for Bio-medical Research, School of Chemistry and Chemical Engineering, Southeast University, Nanjing, 211189, P. R. China*

*<sup>b</sup>Jiangsu entry-exit inspection and quarantine bureau industrial products testing center*

*<sup>1</sup>These authors contributed to equal works.*

**\*Corresponding Author**

\*Dr. Anran Liu, Jiangsu Engineering Laboratory of Smart Carbon-Rich Materials and Device (CMD), Jiangsu Province Hi-Tech Key Laboratory for Bio-medical Research, School of Chemistry and Chemical Engineering, Southeast University, Nanjing, 211189, P. R. China. Email: [liuar@seu.edu.cn](mailto:liuar@seu.edu.cn)

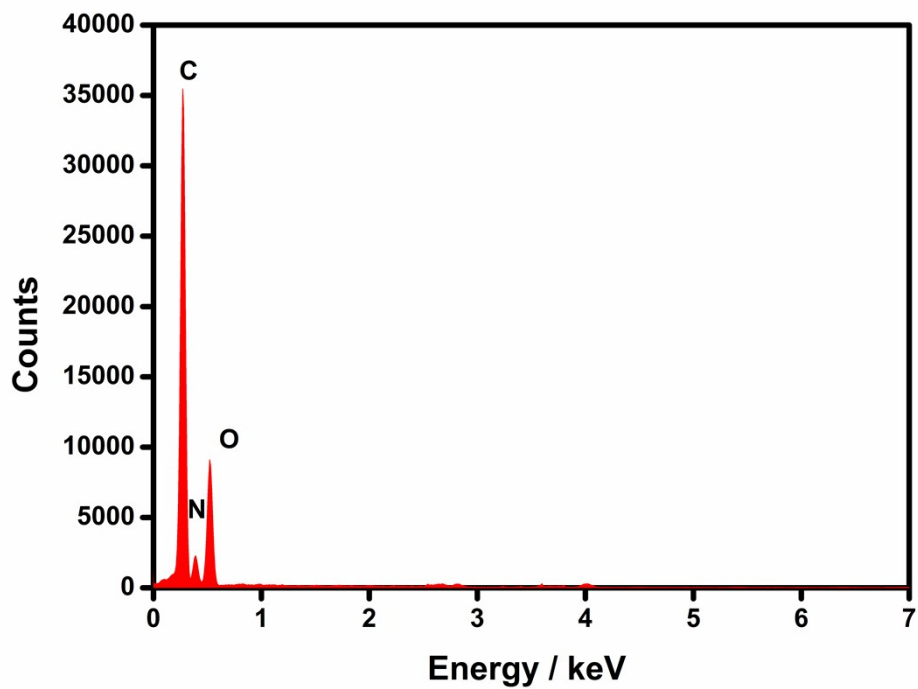

**Fig. S1** EDS spectrum of the N-CDs

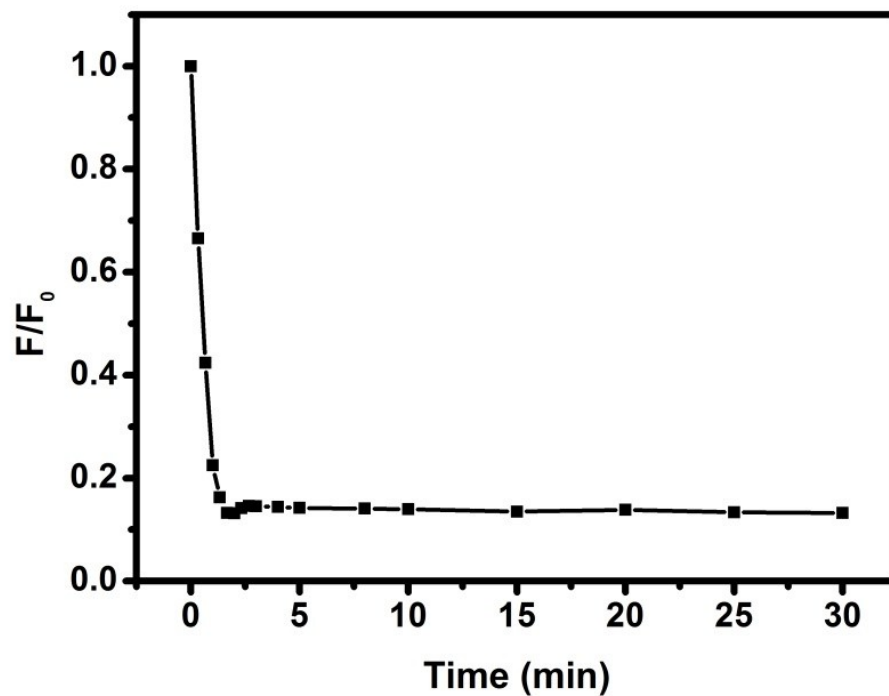

Fig. S2 FL intensity changes over time when adding 10  $\mu\text{M}$   $\text{Cu}^{2+}$ .

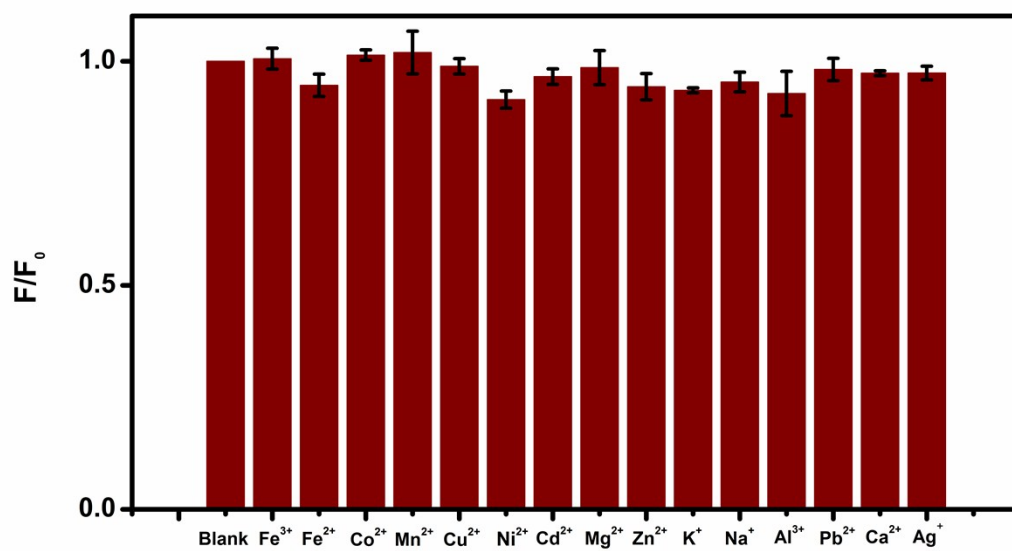

**Fig. S3** Fluorescence response of the bare CDs at presence of 10  $\mu$ M different ionic species

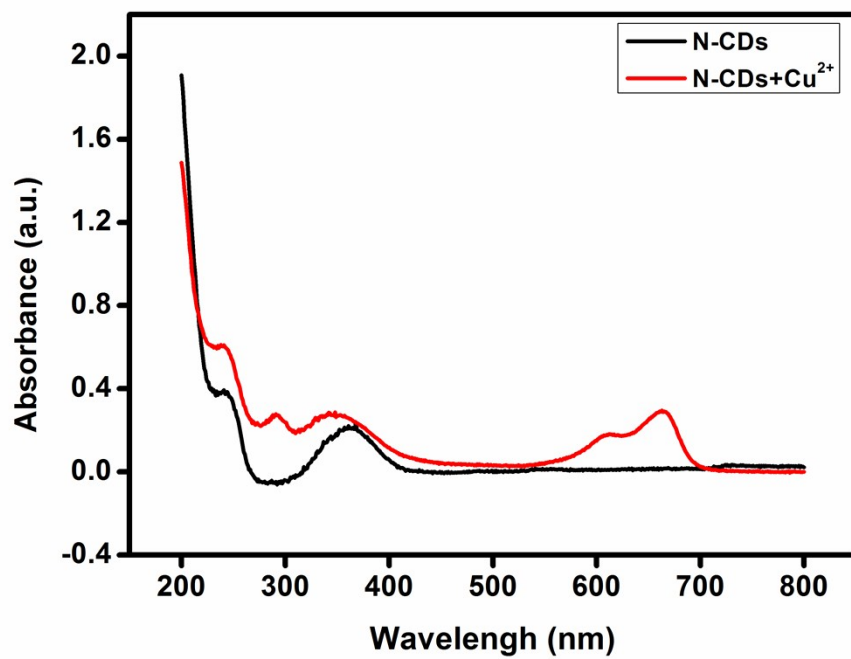

**Fig. S4** UV absorption spectra of the N-CDs and the N-CDs + Cu<sup>2+</sup>

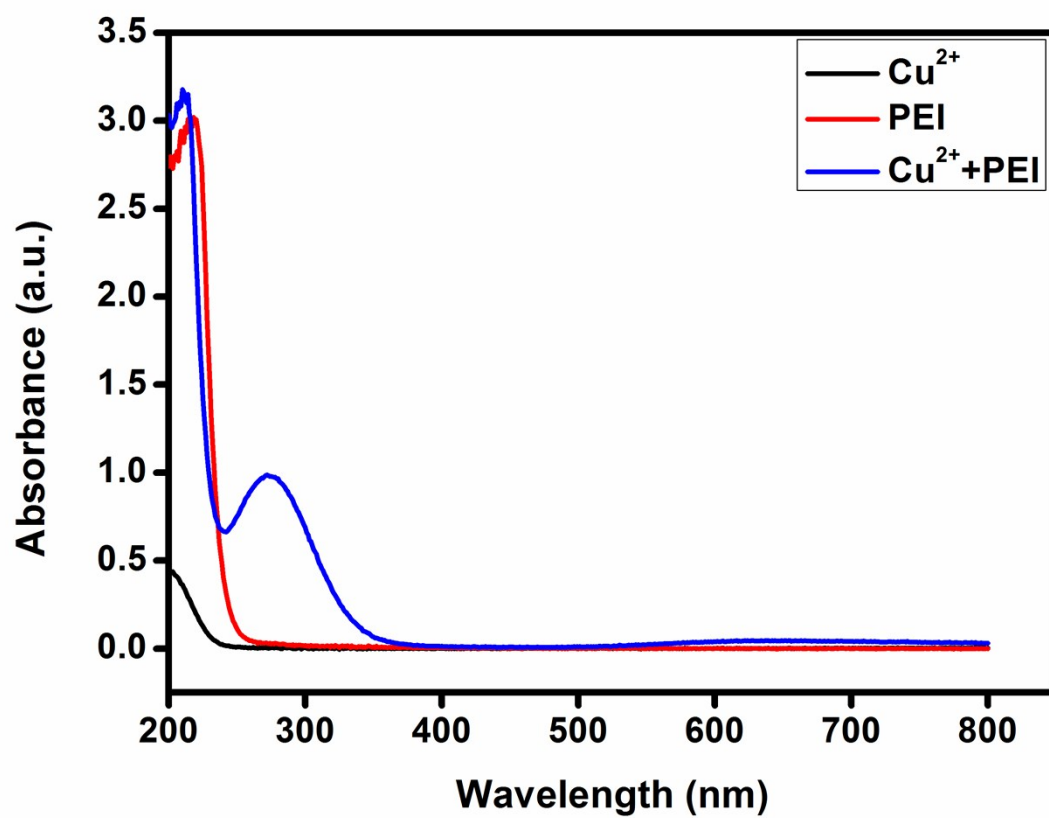

Fig. S5 UV spectra of Cu<sup>2+</sup>, PEI and Cu<sup>2+</sup>+PEI.

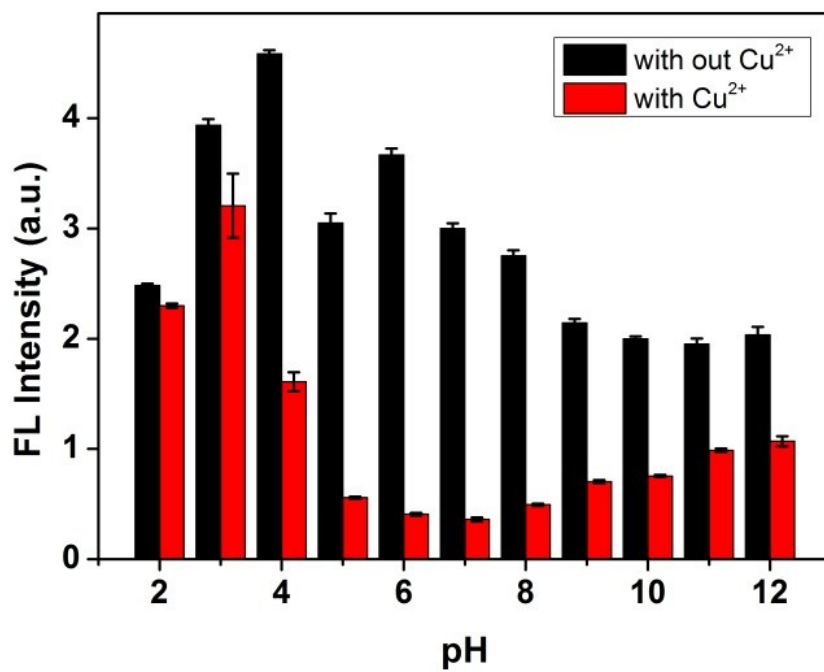

**Fig. S6** Fluorescence responses of 10  $\mu\text{g mL}^{-1}$  N-CDs in the absence (black) and presence (red) of 10  $\mu\text{M}$   $\text{Cu}^{2+}$  at different pH values.

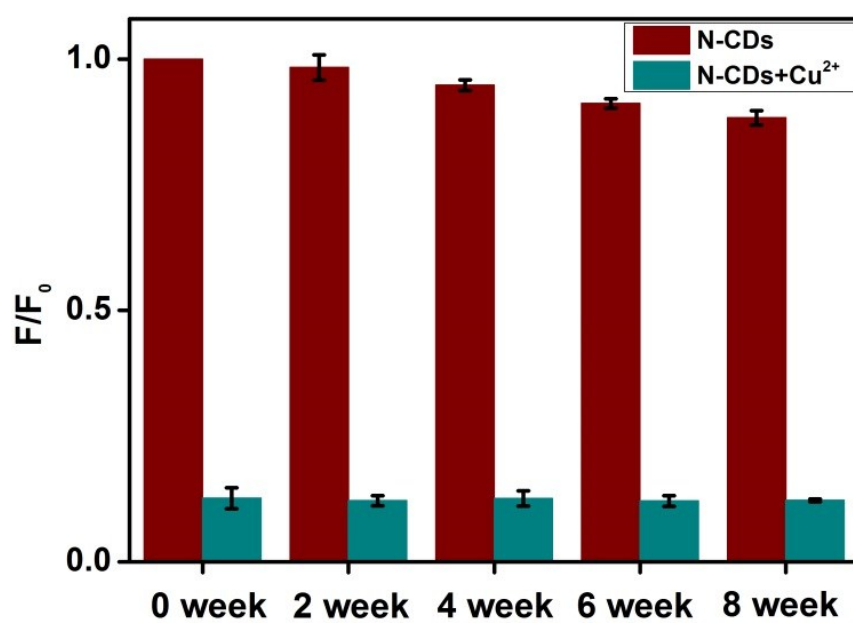

**Fig. S7** Stability tests of the fluorescence intensity of the N-CDs and Cu<sup>2+</sup> quenching effect during 8 weeks.



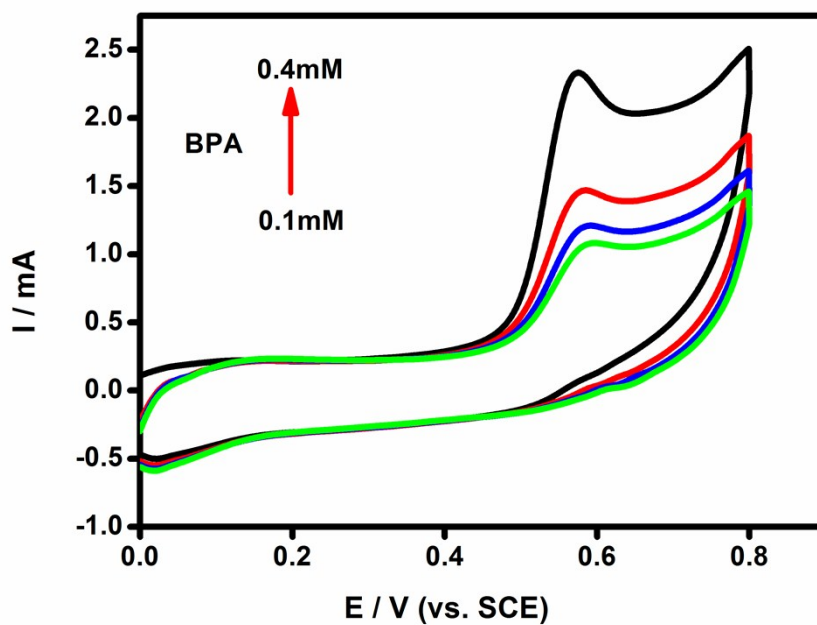

**Fig. S8** CV responses to different concentrations of BPA of 0.1, 0.2, 0.3 and 0.4 mM with N-CDs modified GCE.

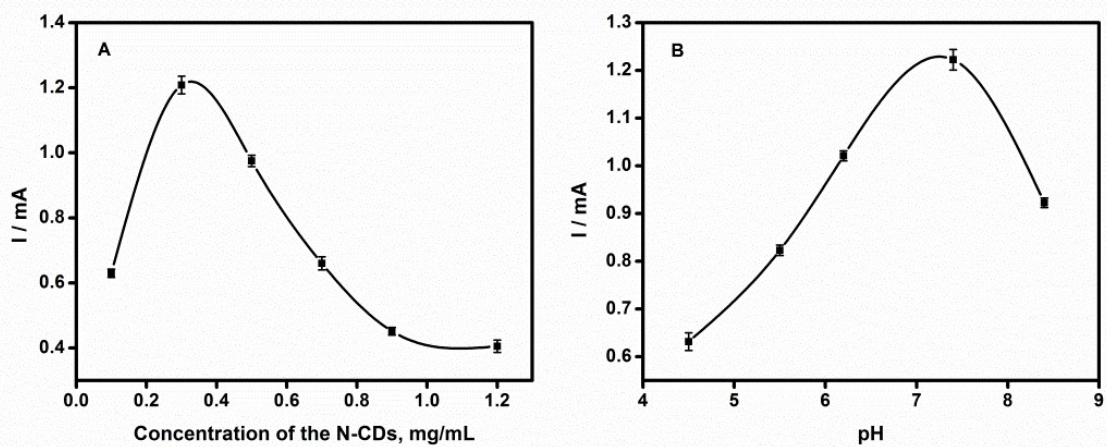

**Fig. S9** Effect of the concentration of the N-CDs (A) and pH (B) on the oxidation current of the response to 0.2 mM BPA.

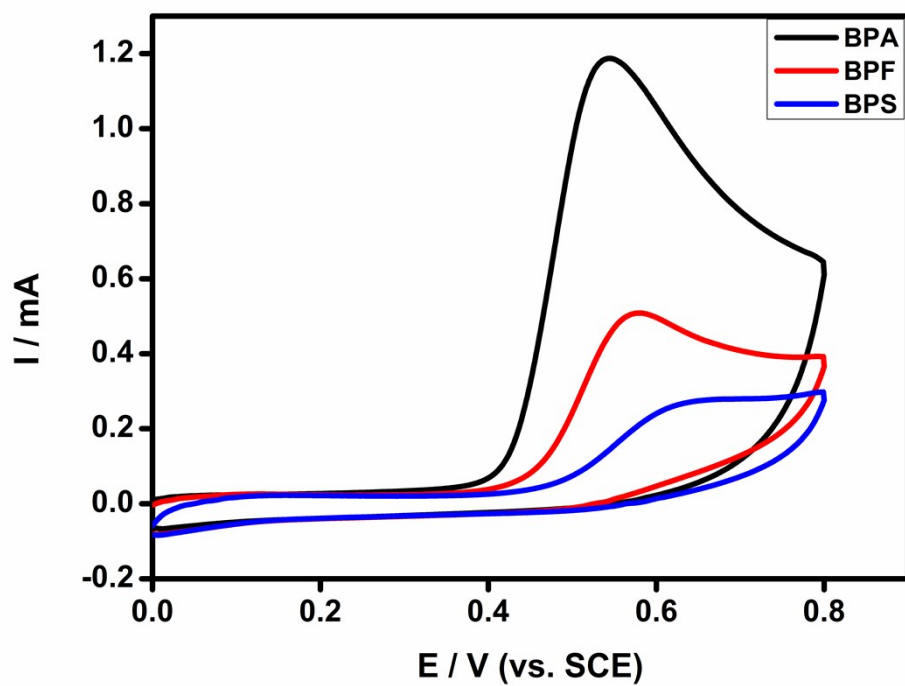

**Fig. S10** CVs of the response to different modified GCE in the presence of 0.2 mM BPA, BPF and BPS in pH 7.40 PBS solution.
